# Supplementary material for: A dinuclear ruthenium(II) complex as turn-on luminescent probe for hypochlorous acid and its application for in vivo imaging
Source: PubMed Central journal article supplement (PMC4928191; doi:10.1038/srep29065), 2016-06-30
Supplement: srep29065-s1.pdf [file srep29065-s1.pdf]

A dinuclear ruthenium(II) complex as turn-on luminescent probe for  
hypochlorous acid and its application for in vivo imaging

Zonglun Liu<sup>1</sup>, Kuo Gao<sup>2</sup>, Beng Wang<sup>1</sup>, Hui Yan<sup>1</sup>, Panfei Xing<sup>1</sup>, Chongmin Zhong<sup>1</sup>,  
Yongqian Xu<sup>1</sup>, Hongjuan Li<sup>1</sup>, Jianxin Chen<sup>2</sup>, Wei Wang<sup>2</sup> & Shiguo Sun<sup>1</sup>

<sup>1</sup>College of Science, Northwest A&F University, Yangling, Shaanxi, 712100, China.

<sup>2</sup>Beijing University of Chinese Medicine, No.11 Beisanhuandonglu, Chaoyang  
District, Beijing, 100029, China.

**Corresponding author**

Correspondence to: Shiguo Sun, [sunsg@nwsuaf.edu.cn](mailto:sunsg@nwsuaf.edu.cn); Jianxin Chen,  
[cjx@bucm.edu.cn](mailto:cjx@bucm.edu.cn); Wei Wang, [wangwei@bucm.edu.cn](mailto:wangwei@bucm.edu.cn).

### Calculation of the detection limit

The limit of detection (LOD) was calculated according to the formula in the literature. (*Spectroscopy* 2003, 12, 112-114. *Anal. Chem.* 2009, 11, 4555-4559. *Dalton Trans.* 2013, 42, 15113-15119).

$$\text{LOD} = \frac{3\sigma}{k}$$

Where  $\sigma$  is the standard deviation of the blank solution measured by 10 times; k is the slope of the calibration curve.

The detection limit was calculated based on the fluorescence titration. Increasing amounts of HClO were added to the probe (10  $\mu\text{M}$ ) in PBS buffer. Representation of fluorescence at the appropriate wavelength vs. concentration of HClO allowed the limit of detection to be calculated. From Figure S7, we get slope  $k = 0.0313$ , and  $\sigma$  value is 0.00456. Thus using the formula we get the limit of detection (LOD) =  $4.37 \times 10^{-7}$  M.

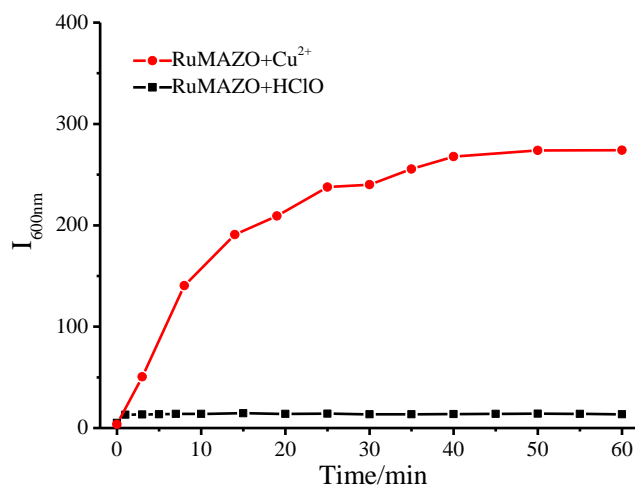

**Figure S1.** Time-dependent luminescence intensity of RuMAZO (10  $\mu\text{M}$ ) at 600 nm treated with HClO (100  $\mu\text{M}$ ) or  $\text{Cu}^{2+}$  (20  $\mu\text{M}$ ) in HEPES buffer (10 mM, pH 7.4) with  $\lambda_{\text{ex}} = 465$  nm.

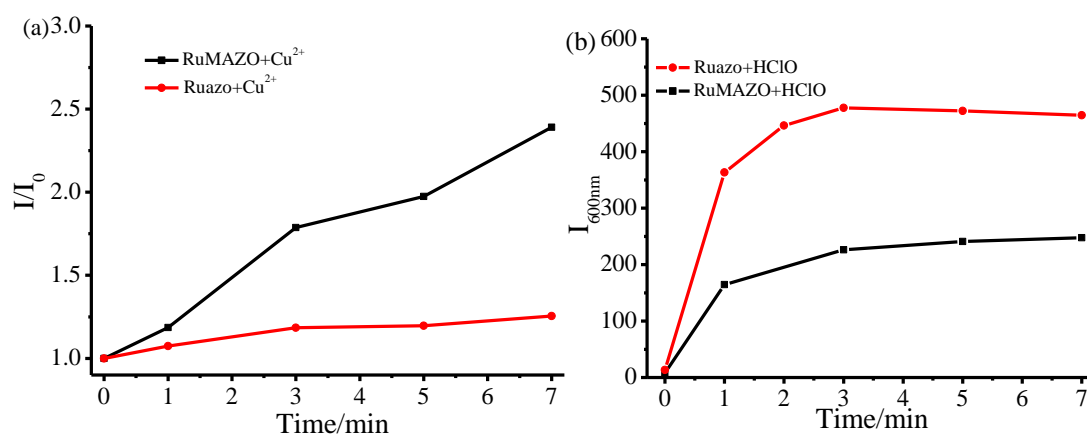

**Figure S2.** (a) Time-dependent luminescence changes of RuMAZO (10  $\mu\text{M}$ ) or Ruazo (10  $\mu\text{M}$ ) treated with  $\text{Cu}^{2+}$  (100  $\mu\text{M}$ ) in PBS buffer (10 mM, pH 7.4). (b) Time-dependent luminescence intensity of Ruazo (10  $\mu\text{M}$ ) and RuMAZO (10  $\mu\text{M}$ ) treated with HClO (100  $\mu\text{M}$ ) in PBS buffer (10 mM, pH 7.4) with  $\lambda_{\text{ex}} = 465$  nm,  $\lambda_{\text{em}} = 600$  nm.

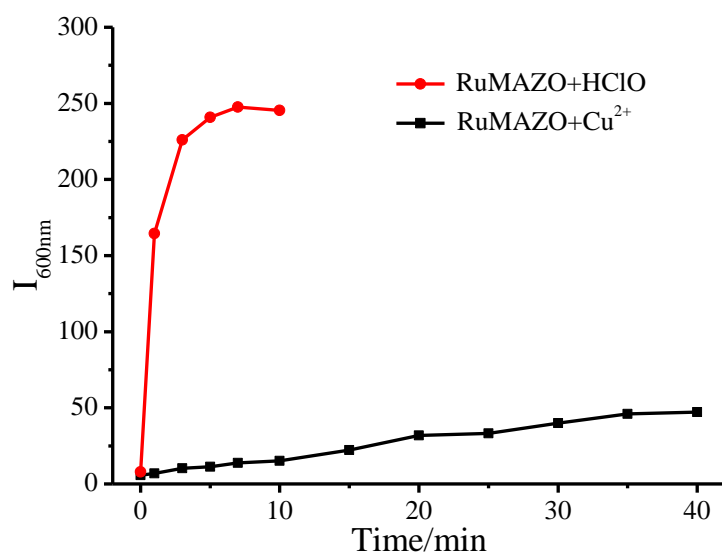

**Figure S3** Time-dependent luminescence intensity of RuMAZO (10  $\mu\text{M}$ ) treated with HClO (100  $\mu\text{M}$ ) or  $\text{Cu}^{2+}$  (100  $\mu\text{M}$ ) in PBS buffer (10 mM, pH 7.4) with  $\lambda_{\text{ex}} = 465 \text{ nm}$ ,  $\lambda_{\text{em}} = 600 \text{ nm}$ .

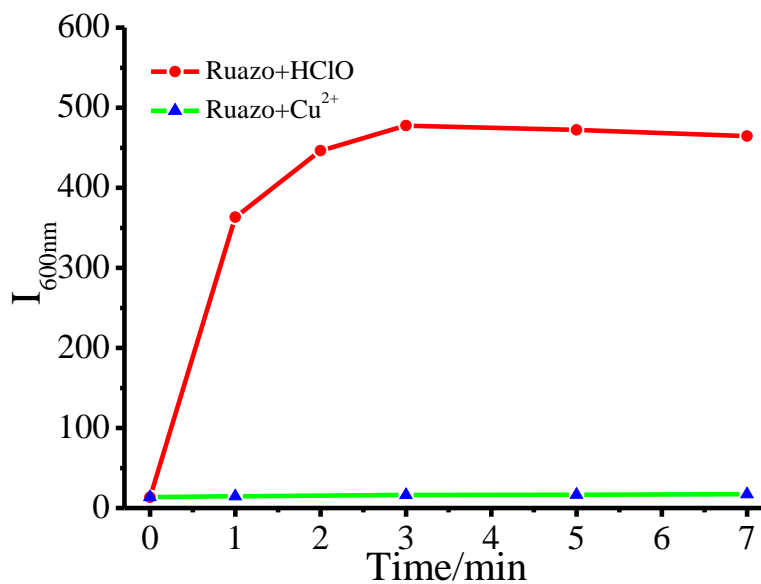

**Figure S4** Time-dependent luminescence intensity of Ruazo (10  $\mu\text{M}$ ) treated with HClO (100  $\mu\text{M}$ ) or  $\text{Cu}^{2+}$  (100  $\mu\text{M}$ ) in PBS buffer (10 mM, pH 7.4) with  $\lambda_{\text{ex}} = 465 \text{ nm}$ ,  $\lambda_{\text{em}} = 600 \text{ nm}$ .

## Kinetics of luminescence enhancement profile

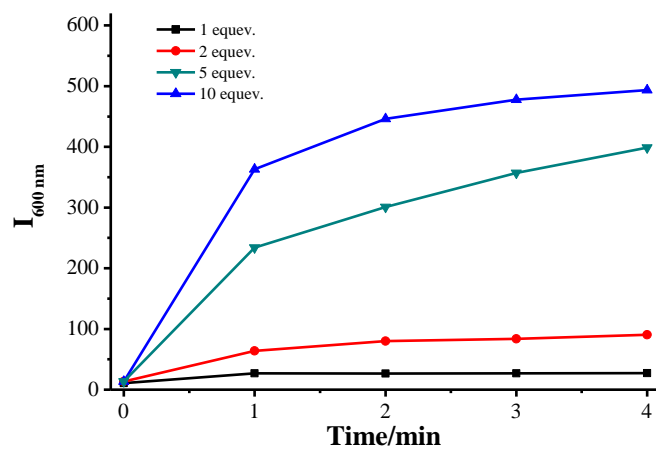

**Figure S5.** Time-dependent luminescence intensity of Ruazo (10  $\mu\text{M}$ ) at 600 nm treated with various concentrations of HClO in PBS buffer (10 mM, pH 7.4) with  $\lambda_{\text{ex}} = 465 \text{ nm}$ ,  $\lambda_{\text{em}} = 600 \text{ nm}$ .

## UV-Vis absorption spectra of the probe

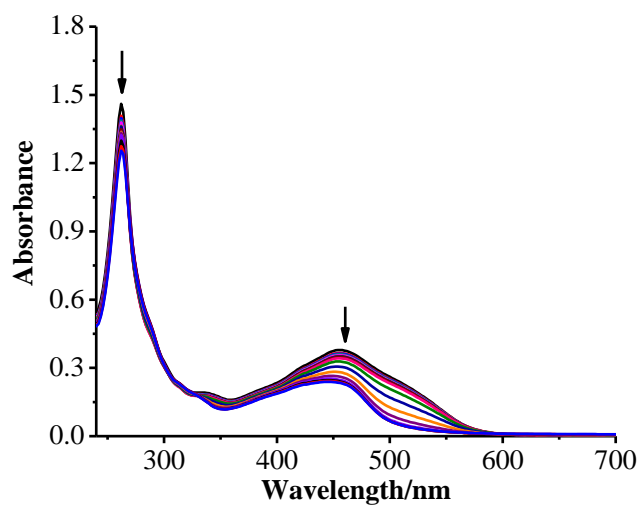

**Figure S6.** UV-Vis spectral changes of Ruazo (10  $\mu\text{M}$ ) upon the addition of various concentrations of HClO (0-100  $\mu\text{M}$ ) in a PBS buffer solution (10 mM, pH 7.4).

## Luminescence spectra of the probe

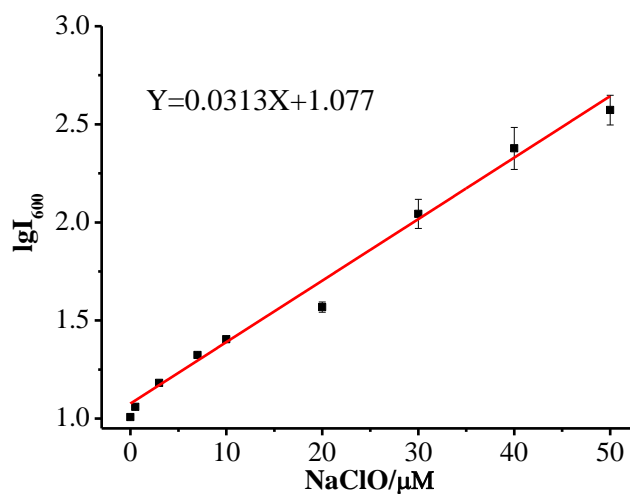

**Figure S7.** A linear correlation between the logarithm of the emission intensity of Ruazo at 600 nm and concentrations of HClO (0.5–50  $\mu\text{M}$ ).

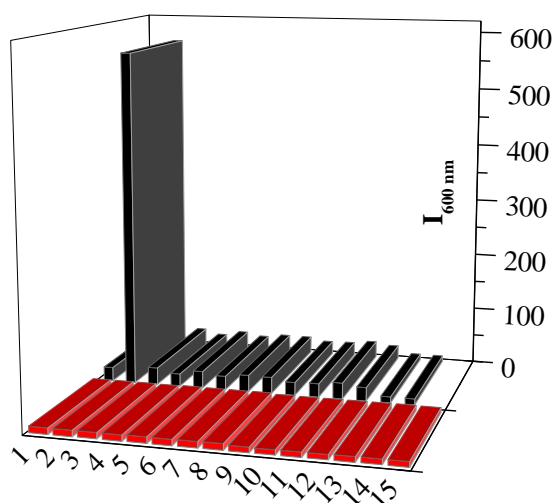

**Figure S8.** Luminescence changes of Ruazo (10  $\mu\text{M}$ ) upon the addition of various common cations (100  $\mu\text{M}$ ), anions (100  $\mu\text{M}$ ) or amino acids (100  $\mu\text{M}$ ) in PBS buffer solution (10 mM, pH 7.4). The black bars from 1-14 represent the luminescence responses toward Blank, HClO,  $\text{AcO}^-$ ,  $\text{HCO}_3^-$ ,  $\text{S}_2^-$ ,  $\text{SO}_4^{2-}$ ,  $\text{NO}_2^-$ ,  $\text{Cl}^-$ ,  $\text{SO}_3^{2-}$ , Cys, Hcy, GSH,  $\text{Al}^{3+}$ ,  $\text{Ba}^{2+}$ ; the red bars from 1-15 represent addition of various common cations ( $\text{Ca}^{2+}$ ,  $\text{Cd}^{2+}$ ,  $\text{Cr}^{3+}$ ,  $\text{Fe}^{3+}$ ,  $\text{Hg}^{2+}$ ,  $\text{K}^+$ ,  $\text{Li}^+$ ,  $\text{Mg}^{2+}$ ,  $\text{Na}^+$ ,  $\text{Ni}^{2+}$ ,  $\text{Pb}^{2+}$ ,  $\text{Zn}^{2+}$ ,  $\text{Co}^{2+}$ ,  $\text{Ag}^+$ ,  $\text{Cu}^{2+}$ ).

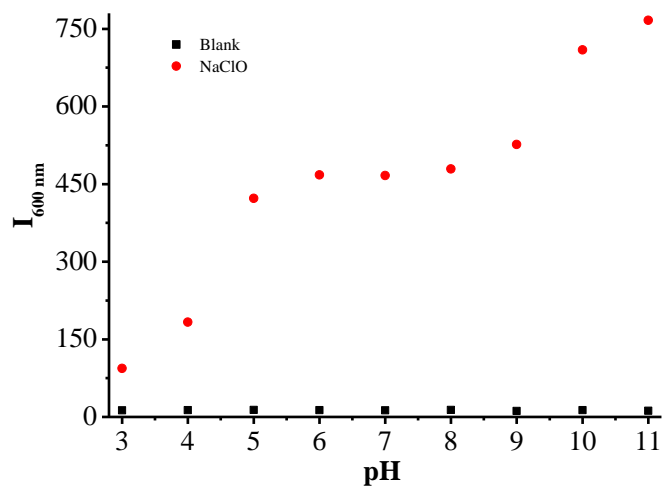

**Figure S9.** The luminescence intensity of Ruazo (10  $\mu\text{M}$ ) and its titration with HClO (100  $\mu\text{M}$ ) under different pH value (2-13).  $\lambda_{\text{ex}} = 465 \text{ nm}$ ,  $\lambda_{\text{em}} = 600 \text{ nm}$ .

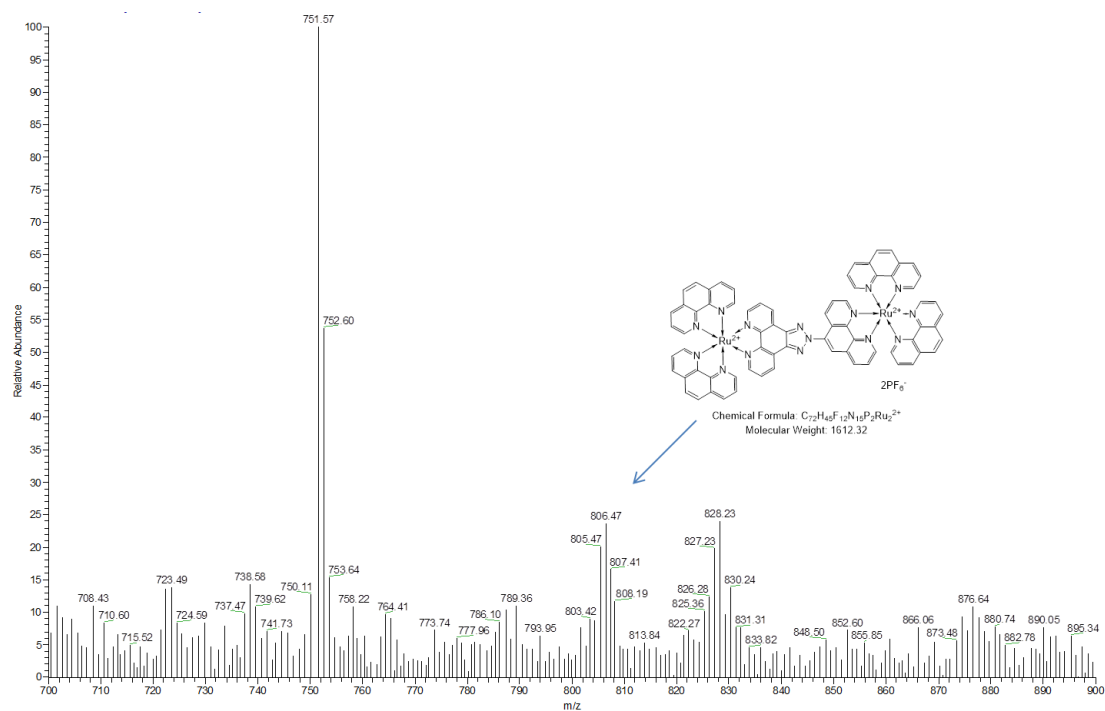

**Figure S10.** MS spectrum of the product the probe Ruazo reacted with HClO.

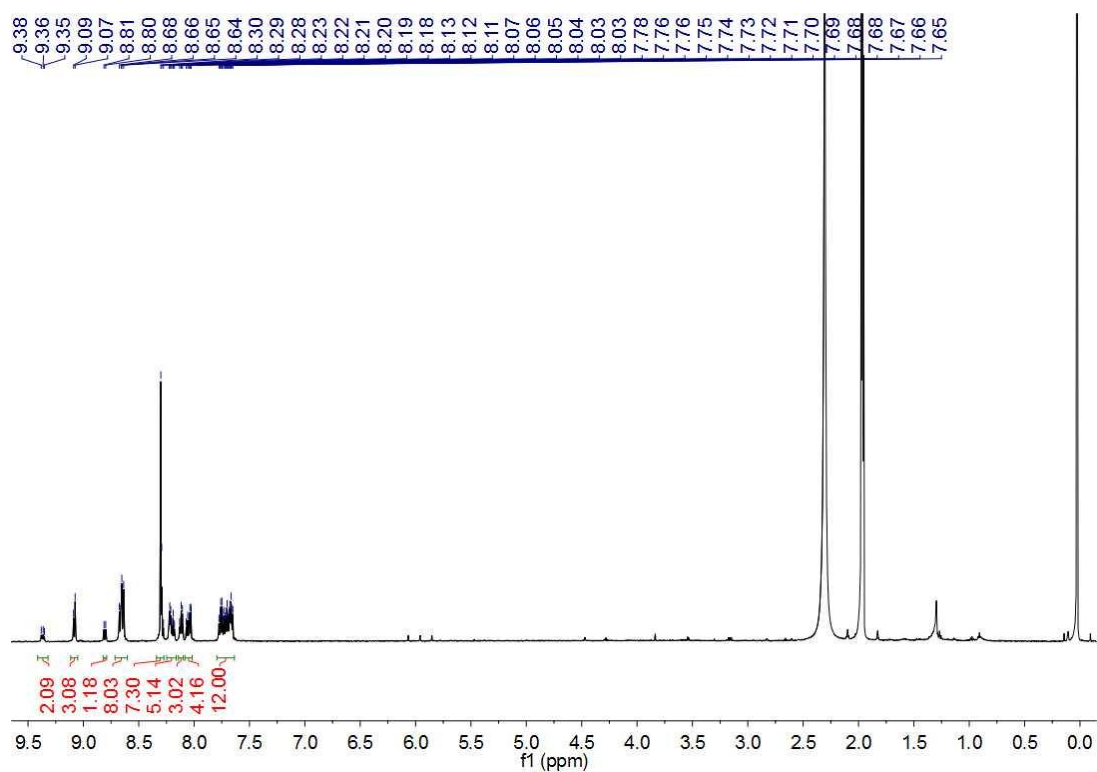

**Figure S11.**  $^1\text{H}$  NMR spectrum of the Rutazo.

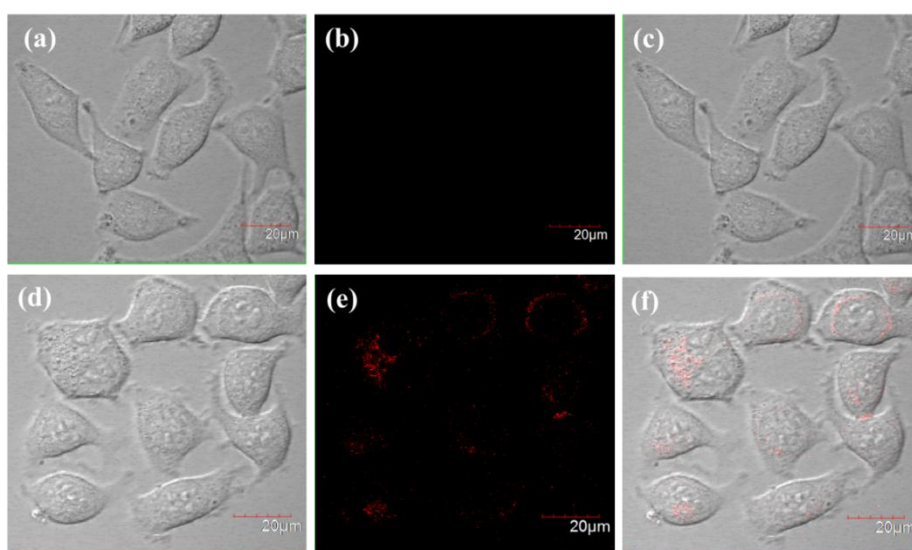

**Figure S12.** Confocal fluorescence images of HClO in HeLa cells. (a) Bright-field image of cells incubated with probe (10  $\mu\text{M}$ ) for 90 min; (d) Bright-field image of cells after treatment with 50  $\mu\text{M}$  HClO for 10 min and then treatment with 10  $\mu\text{M}$  probe for 90 min; (b) and (e) Luminescence-field images of the HeLa cells (550–650 nm); (c) and (f) Overlap of bright-field and luminescence.  $\lambda_{\text{exc}} = 488$  nm.



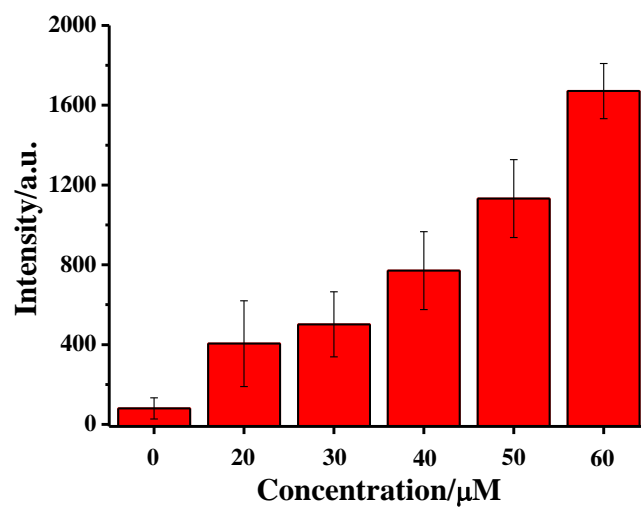

**Figure S13** The luminescence intensity at different concentrations of HClO (0, 20, 30, 40, 50, 60 μM) and the concentration of Ruazo was 10 μM.

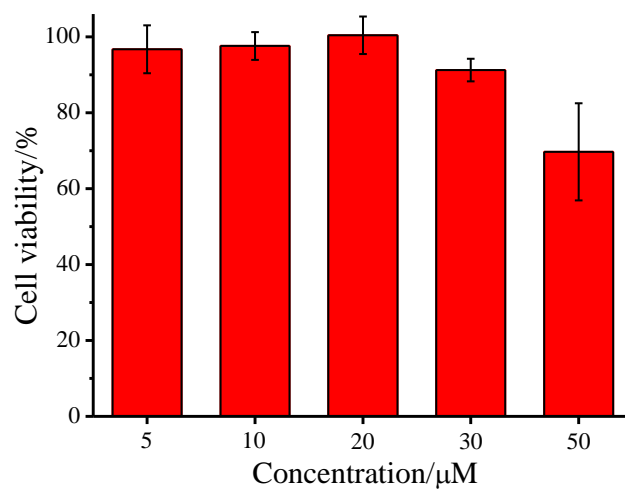

**Figure S14.** Percentage of HeLa cell viability remaining after cell treatment with Ruazo (the untreated cells were considered to have 100% survival).

## Synthesis of Ruazo

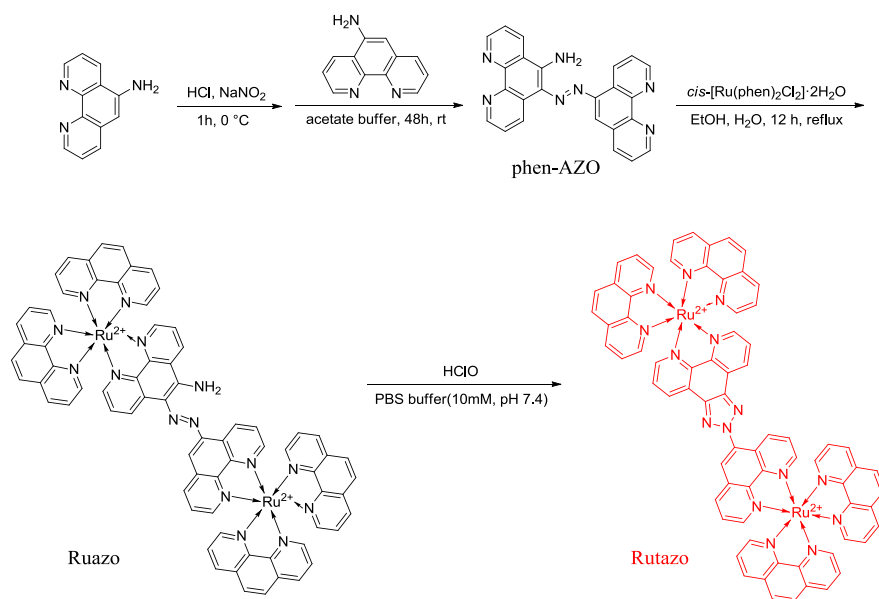

**Figure S15.** Synthesis of Ruazo and the proposed mechanism of response of the probe towards hypochlorous acid.

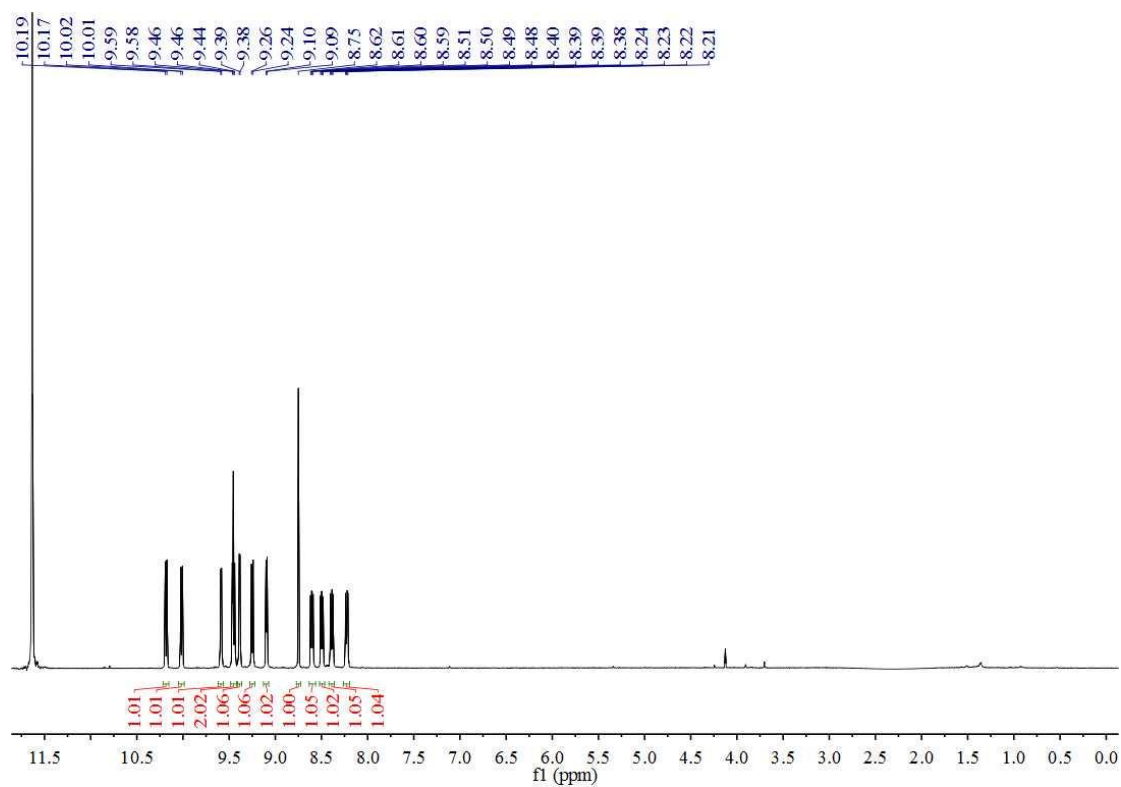

**Figure S16.**  $^1\text{H}$  NMR spectrum of ligand phen-AZO.

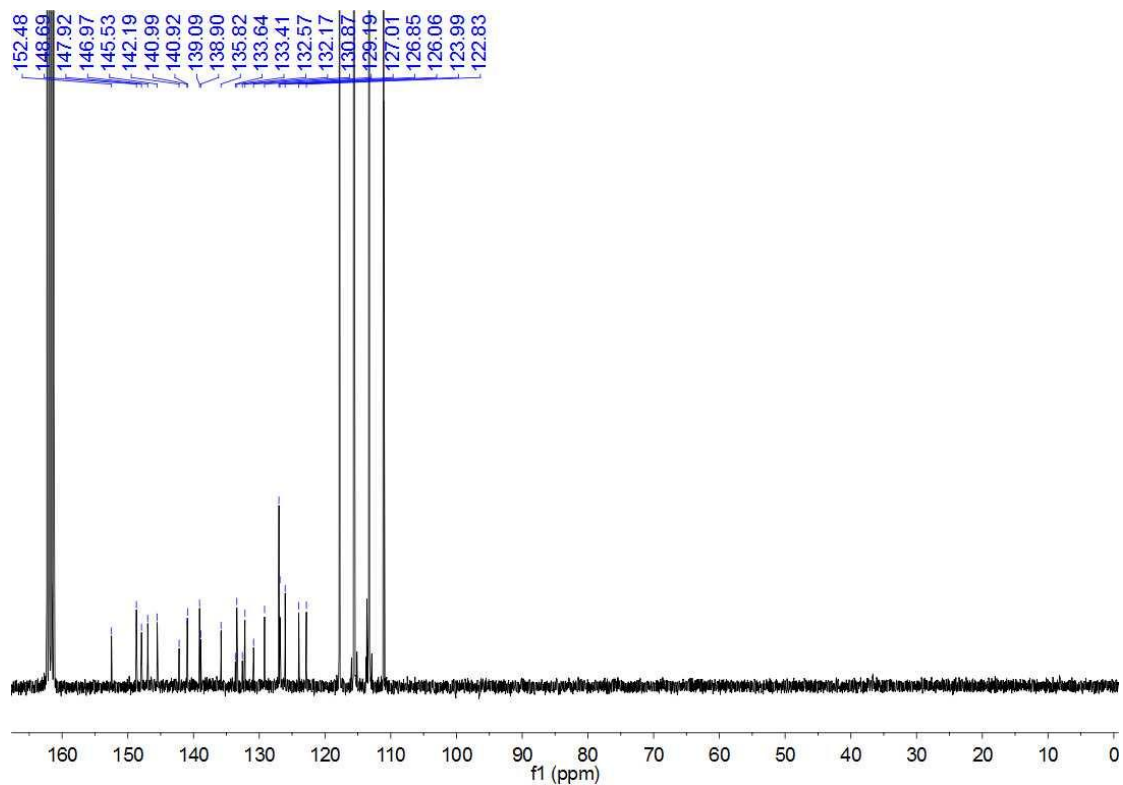

Figure S17.  $^{13}\text{C}$  NMR spectrum of ligand phen-AZO.

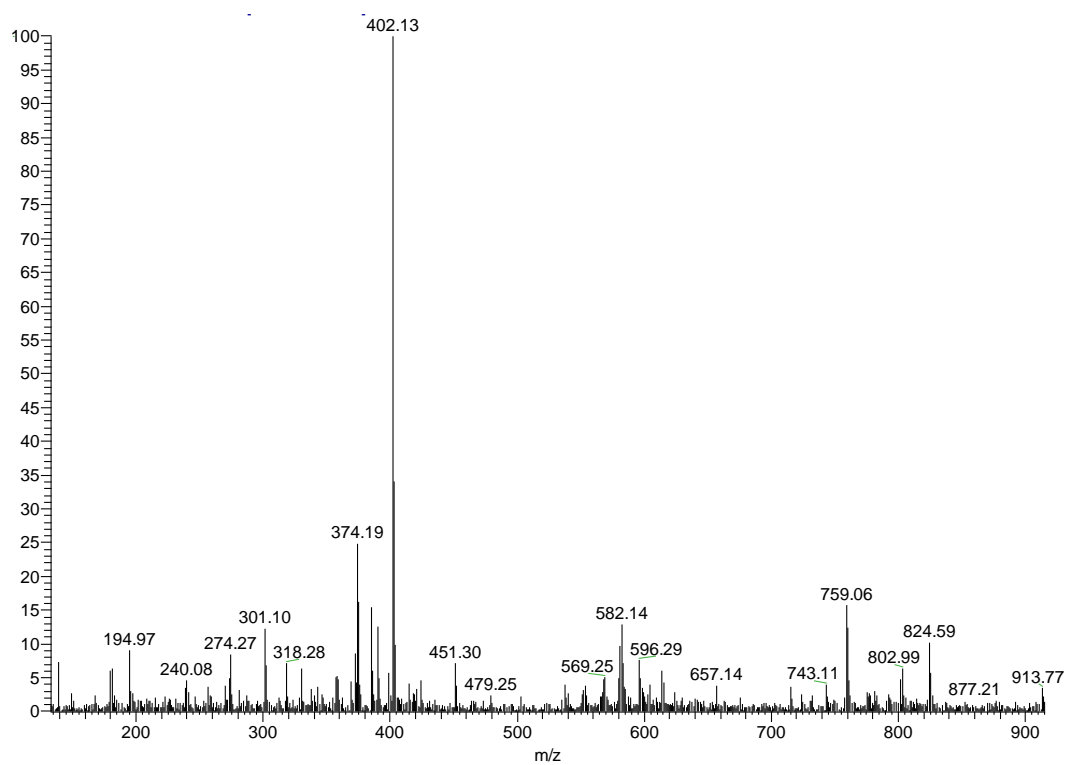

Figure S18. MS spectrum of ligand phen-AZO.

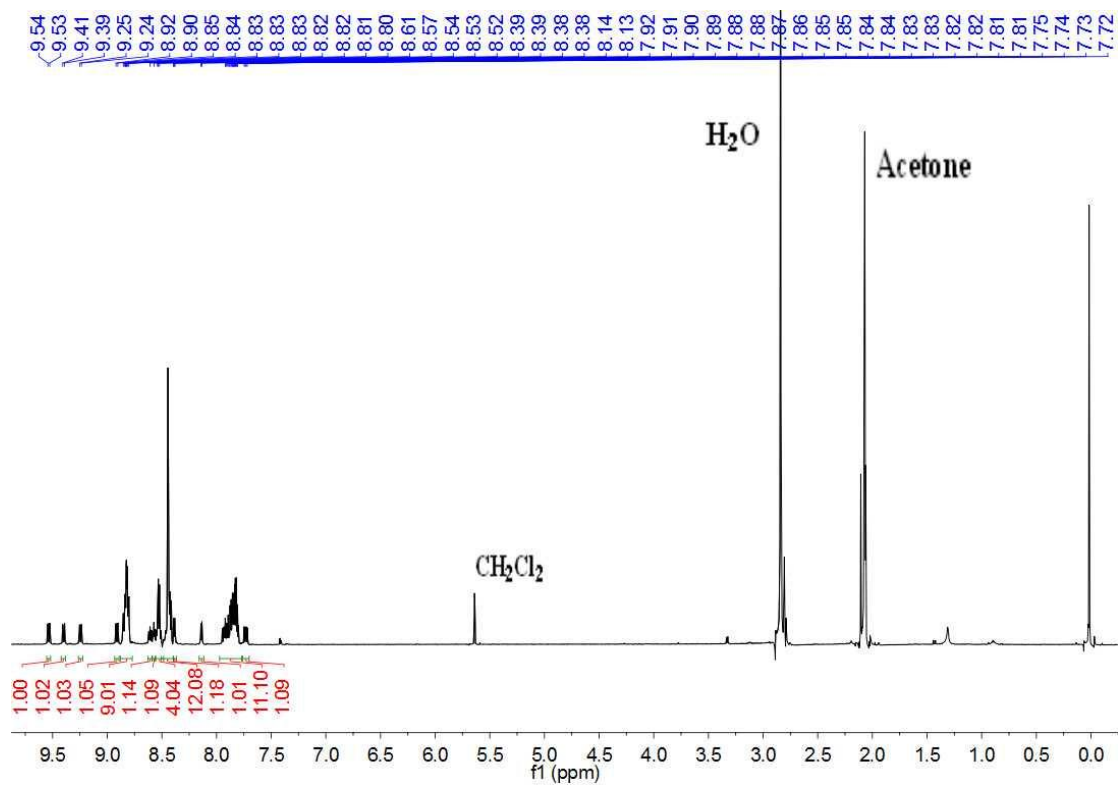

Figure S19. <sup>1</sup>H NMR spectrum of the probe Ruazo.

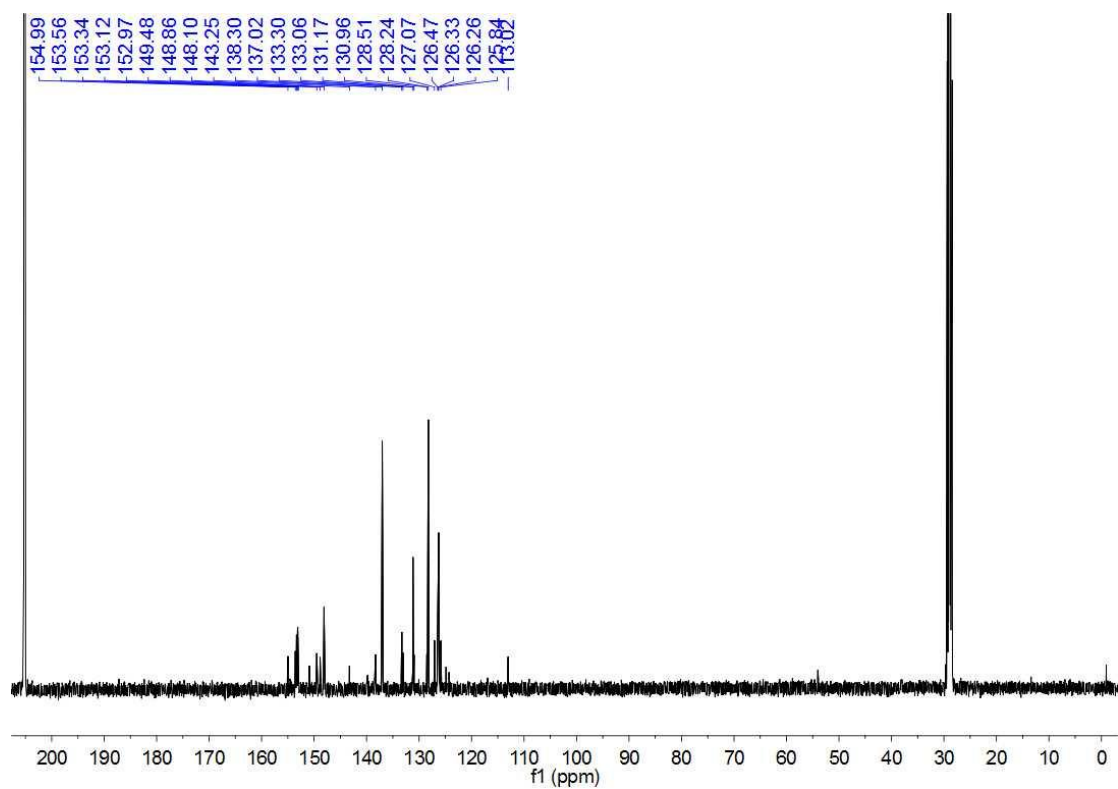

Figure S20. <sup>13</sup>C NMR spectrum of the probe Ruazo.

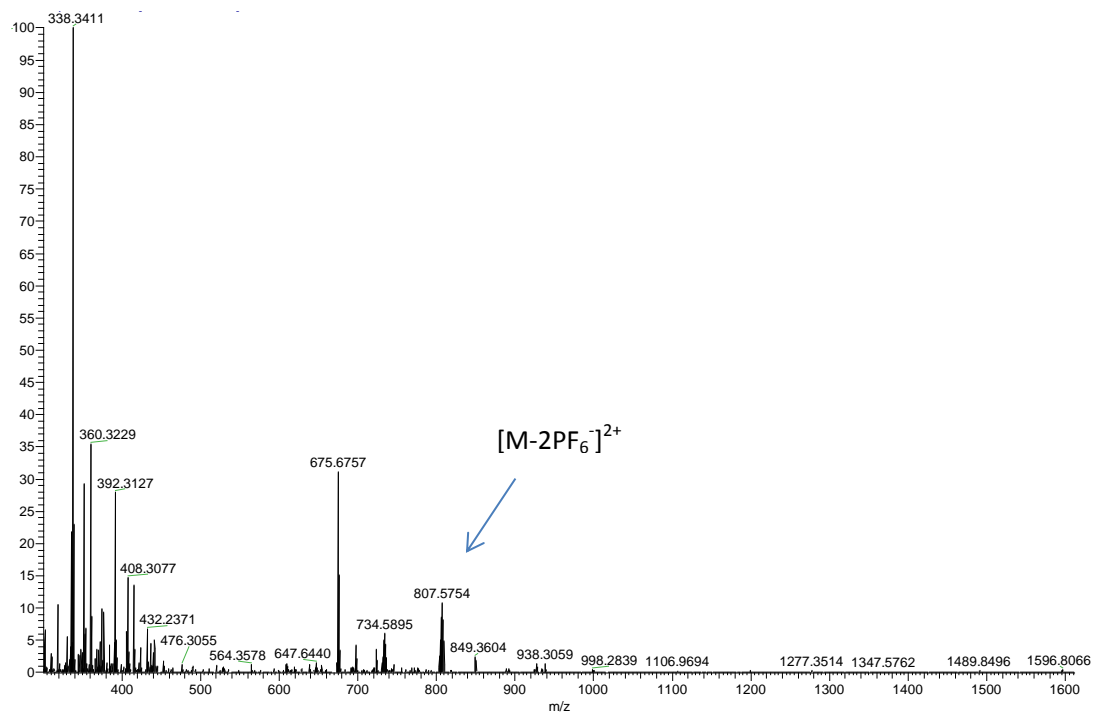

**Figure S21.** HRMS spectrum of the probe Ruazo.
